# Supplementary material
Source: PubMed Central journal article supplement (PMC5531073)
Supplement: NIHMS880081-supplement-1.pdf [file NIHMS880081-supplement-1.pdf]

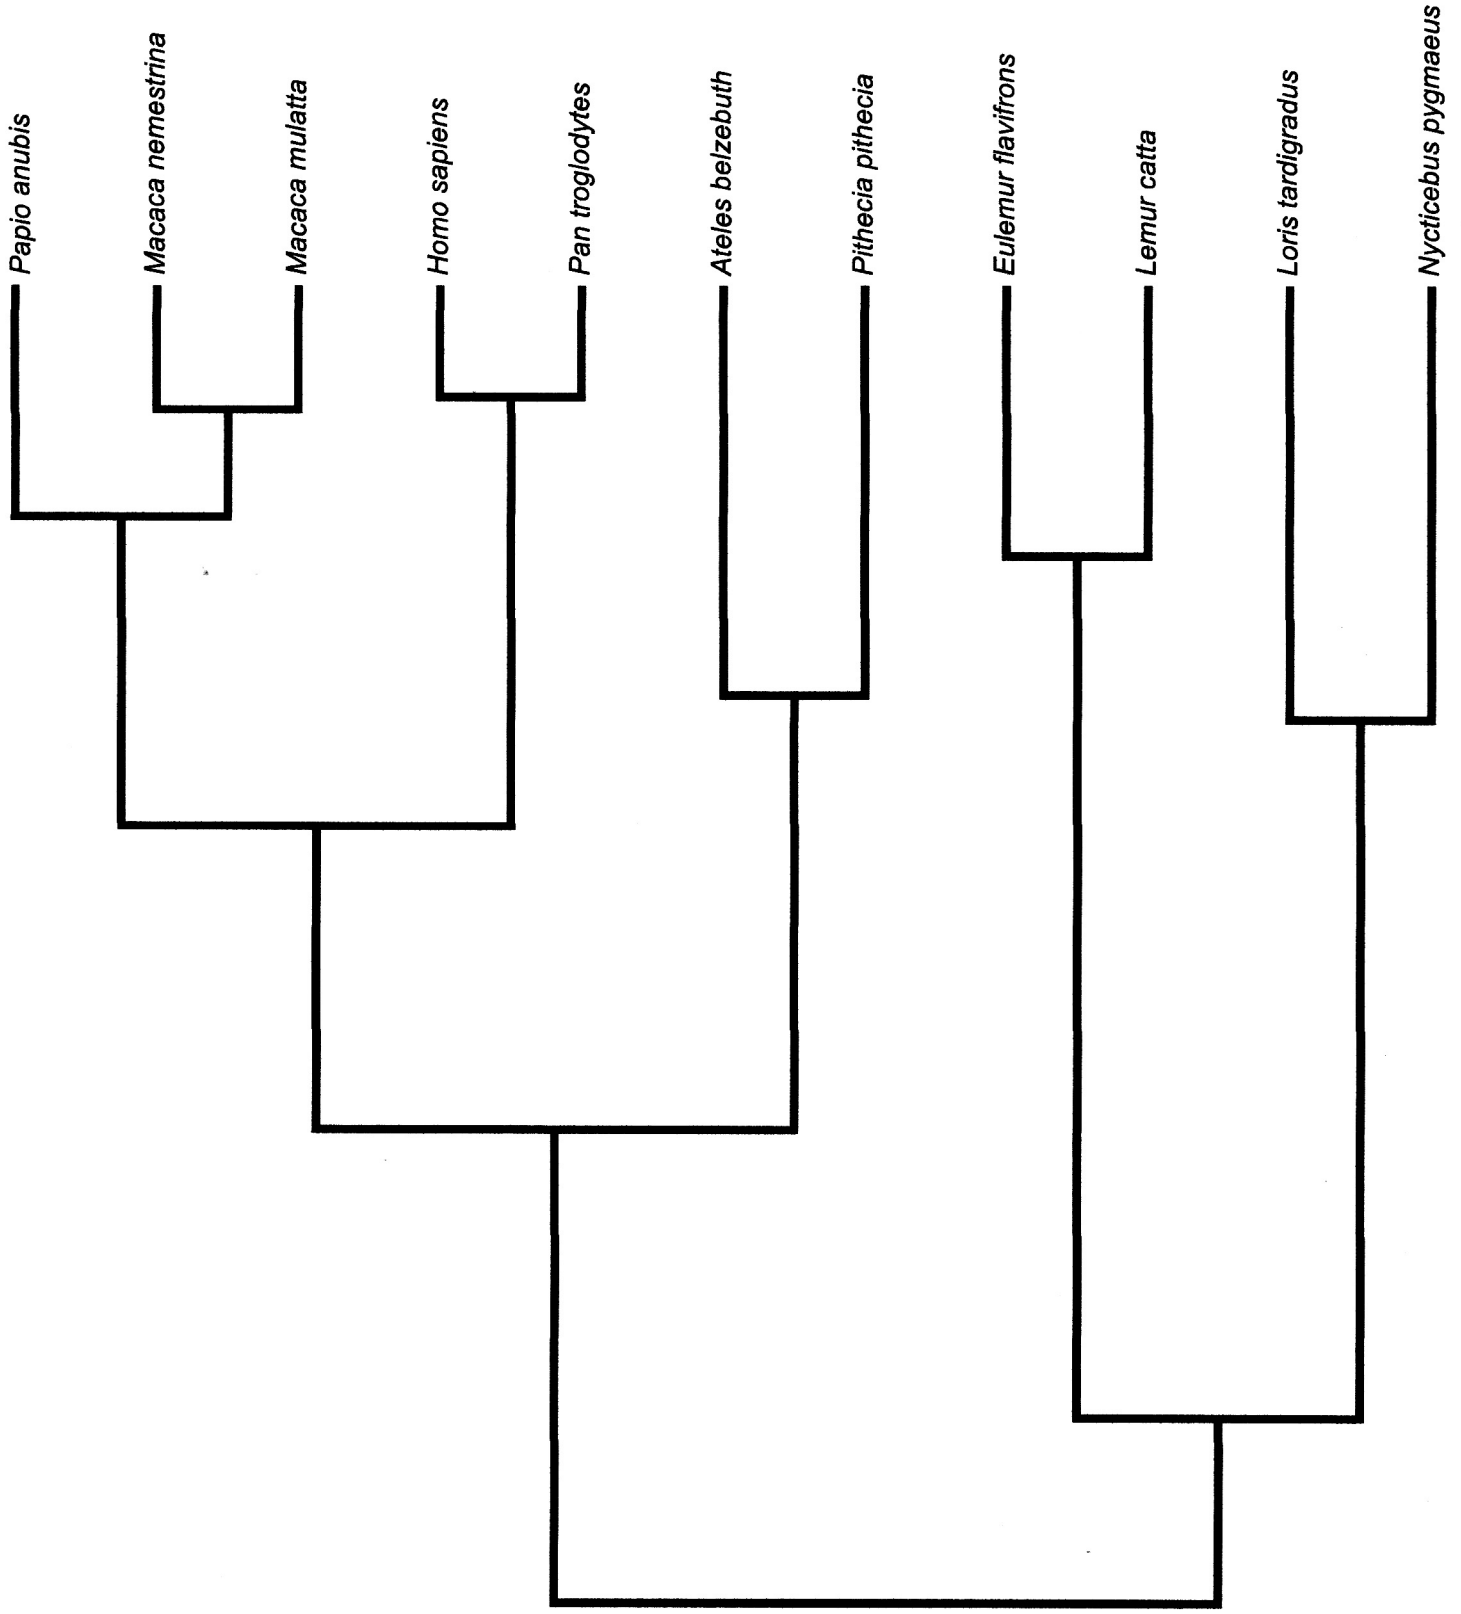

10 Ma

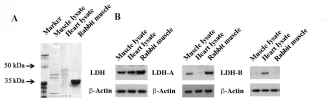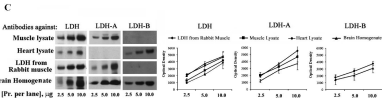

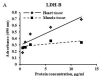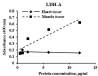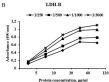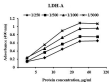

A

LDH-A (Neocortex)

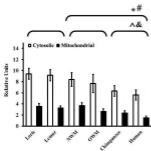

LDH-A (Striatum)

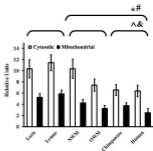

B

LDH-B (Neocortex)

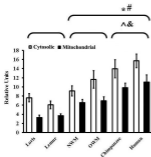

LDH-B (Striatum)

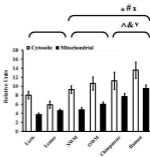

### Cytosolic fraction

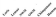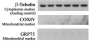

### Mitochondrial fraction

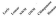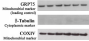

**Table A.1 Characteristics of primate species, brain regions examined, and methods used**

| SPECIES                                                 | AGE (years) | SEX | Brain Regions | Experimental methods |       |
|---------------------------------------------------------|-------------|-----|---------------|----------------------|-------|
|                                                         |             |     |               | Western Blot         | ELISA |
| Blue-eyed black lemur ( <i>Eulemur flavifrons</i> )     | 18.1        | F   | Neocortex     | Yes                  | No    |
|                                                         |             |     | Striatum      | No                   | No    |
| Ring-tailed lemur ( <i>Lemur catta</i> )                | 15          | F   | Neocortex     | Yes                  | No    |
|                                                         |             |     | Striatum      | No                   | Yes   |
| Ring-tailed lemur ( <i>Lemur catta</i> )                | 24          | F   | Neocortex     | No                   | Yes   |
|                                                         |             |     | Striatum      | Yes                  | Yes   |
| Red slender loris ( <i>Loris tardigradus</i> )          | 18.4        | M   | Neocortex     | Yes                  | No    |
|                                                         |             |     | Striatum      | No                   | No    |
| Pygmy slow loris ( <i>Nycticebus pygmaeus</i> )         | 14          | M   | Neocortex     | Yes                  | No    |
|                                                         |             |     | Striatum      | No                   | No    |
| Pygmy slow loris ( <i>Nycticebus pygmaeus</i> )         | 10          | M   | Neocortex     | Yes                  | Yes   |
|                                                         |             |     | Striatum      | Yes                  | Yes   |
| White fronted spider monkey ( <i>Ateles belzebuth</i> ) | 36          | F   | Neocortex     | Yes                  | No    |
|                                                         |             |     | Striatum      | No                   | No    |
| White-faced saki ( <i>Pithecia pithecia</i> )           | 10          | F   | Neocortex     | Yes                  | Yes   |
|                                                         |             |     | Striatum      | Yes                  | Yes   |
| Squirrel monkey ( <i>Saimiri sciureus</i> )             | 30          | F   | Neocortex     | Yes                  | Yes   |
|                                                         |             |     | Striatum      | Yes                  | Yes   |
| Olive baboon ( <i>Papio anubis</i> )                    | 6.5         | F   | Neocortex     | Yes                  | No    |
|                                                         |             |     | Striatum      | No                   | No    |
| Rhesus macaque ( <i>Macaca mulatta</i> )                | 23.3        | F   | Neocortex     | Yes                  | Yes   |
|                                                         |             |     | Striatum      | Yes                  | Yes   |
| Rhesus macaque ( <i>Macaca mulatta</i> )                | 24.5        | M   | Neocortex     | Yes                  | Yes   |
|                                                         |             |     | Striatum      | Yes                  | Yes   |
| Rhesus macaque ( <i>Macaca mulatta</i> )                | 13.2        | M   | Neocortex     | Yes                  | Yes   |
|                                                         |             |     | Striatum      | Yes                  | Yes   |
| Rhesus macaque ( <i>Macaca mulatta</i> )                | 15.67       | F   | Neocortex     | Yes                  | Yes   |

|                                                |      |   |           |     |     |
|------------------------------------------------|------|---|-----------|-----|-----|
|                                                |      |   | Striatum  | Yes | Yes |
| Pigtailed macaque ( <i>Macaca nemestrina</i> ) | 15.6 | M | Neocortex | Yes | No  |
|                                                |      |   | Striatum  | No  | No  |
| Chimpanzee ( <i>Pan troglodytes</i> )          | 31.2 | M | Neocortex | Yes | No  |
|                                                |      |   | Striatum  | No  | No  |
| Chimpanzee ( <i>Pan troglodytes</i> )          | 22.4 | F | Neocortex | Yes | Yes |
|                                                |      |   | Striatum  | Yes | Yes |
| Chimpanzee ( <i>Pan troglodytes</i> )          | 26.4 | M | Neocortex | Yes | Yes |
|                                                |      |   | Striatum  | Yes | Yes |
| Chimpanzee ( <i>Pan troglodytes</i> )          | 22.9 | M | Neocortex | Yes | Yes |
|                                                |      |   | Striatum  | Yes | Yes |
| Chimpanzee ( <i>Pan troglodytes</i> )          | 31.2 | M | Neocortex | Yes | Yes |
|                                                |      |   | Striatum  | No  | No  |
| Human ( <i>Homo sapiens</i> )                  | 73   | M | Neocortex | Yes | No  |
|                                                |      |   | Striatum  | No  | No  |
| Human ( <i>Homo sapiens</i> )                  | 78   | F | Neocortex | Yes | No  |
|                                                |      |   | Striatum  | No  | No  |
| Human ( <i>Homo sapiens</i> )                  | 46.4 | F | Neocortex | Yes | Yes |
|                                                |      |   | Striatum  | Yes | Yes |
| Human ( <i>Homo sapiens</i> )                  | 51.2 | M | Neocortex | Yes | Yes |
|                                                |      |   | Striatum  | Yes | Yes |
| Human ( <i>Homo sapiens</i> )                  | 49.4 | M | Neocortex | Yes | Yes |
|                                                |      |   | Striatum  | Yes | Yes |
